# Supplementary material for: Factors contributing to COVID-19 is rumour acceptance – results of CEDMO Study
Source: Research Square preprint supplement (doi:10.21203/rs.3.rs-5388432/v1), 2024-12-04
Supplement: Supplementary file 1 [file e658407577c2b538118e7b85.docx]

Appendix 1 Structure of original data set and applied weights

|  | Original data set (%) | Applied weights (%) |
| --- | --- | --- |
| Sex |  |  |
| Male | 48,55% | 48,90% |
| Female | 51,45% | 51,10% |
| Age |  |  |
| 16-24 years | 7,26% | 9,90% |
| 25-34 years | 11,25% | 14,80% |
| 35-44 years | 17,90% | 18,10% |
| 45-54 years | 17,90% | 17,90% |
| 55-64 years | 17,33% | 14,70% |
| 65+ years | 28,37% | 24,60% |
| Education |  |  |
| Basic school | 9,09% | 12,40% |
| Vocational school | 37,14% | 33,30% |
| High school | 20,42% | 34,90% |
| University | 33,35% | 18,90% |
